# Supplementary material for: Resource Recovery of Spent Lithium-Ion Battery Cathode Materials by a Supercritical Carbon Dioxide System
Source: MDPI journal article supplement (doi:10.3390/molecules29071638), 2024-04-05
Supplement: s1 [file s1]

**Table S1** The relationship between  $m_o$  (cathode + Al weight) and  $m_f$  (Al foil)

| Size (cm <sup>2</sup> ) | $m_o$ (g) | $m_f$ (g) |
|-------------------------|-----------|-----------|
| 1.1 × 0.6               | 0.0328    | 0.0047    |
| 1.2 × 0.8               | 0.0393    | 0.0054    |
| 1-1.1 × 1.2             | 0.0518    | 0.0083    |
| 2.55 × 2.6              | 0.2658    | 0.0352    |
| 3.1-3.4 × 3.2-3.9       | 0.3523    | 0.0464    |
